# Supplementary material
Source: Research Square preprint supplement (doi:10.21203/rs.3.rs-8841930/v1)
Supplement: Supplementary file 1 [file 701f812e24a5ea44c4d70b87.pdf]

**Manuscript Title: Association Between Respiratory Event-Specific Oxygen Desaturation Rate and Blood Pressure Surge in Obstructive Sleep Apnea**  
**Authors: Yanli Gu<sup>1+</sup>, Yujiao Wan<sup>1+</sup>, Jiani Shen<sup>1,2</sup>, Yujie Yuan<sup>1</sup>, Qiyun Ma<sup>1</sup>, Guihong Wei<sup>1</sup>, Xiaochen Xie<sup>1</sup>, Fengjuan Xu<sup>1</sup>, Xiaoxiao Han<sup>1</sup>, Jing Xu<sup>1\*</sup>**

**Table s1** Multiple linear regression analysis with BP surge parameters as dependent variables in subgroups according to age, AHI, BMI

|                                               | BP amplitude         |           |                     |           | BP peak               |        |                        |        | BP surge rate        |           |                      |         |
|-----------------------------------------------|----------------------|-----------|---------------------|-----------|-----------------------|--------|------------------------|--------|----------------------|-----------|----------------------|---------|
|                                               | Model 1 (unadjusted) |           | Model 2 (adjusted)  |           | Model 1 (unadjusted)  |        | Model 2 (adjusted)     |        | Model 1 (unadjusted) |           | Model 2 (adjusted)   |         |
|                                               | β (95% CI)           | P         | β (95% CI)          | P         | β (95% CI)            | P      | β (95% CI)             | P      | β (95% CI)           | P         | β (95% CI)           | P       |
| <b>Age &lt; 60 years (n = 221)</b>            |                      |           |                     |           |                       |        |                        |        |                      |           |                      |         |
| ODR, %/s                                      | 9.23 (6.67, 11.78)   | <0.001*** | 6.23 (3.30, 9.16)   | <0.001*** | 6.06 (-5.55, 17.67)   | 0.305  | -7.10 (-21.16, 6.95)   | 0.320  | 1.08 (0.76, 1.39)    | <0.001*** | 0.60 (0.25, 0.95)    | 0.001** |
| Δt, s                                         | 0.04 (-0.06, 0.13)   | 0.483     | 0.11 (0.02, 0.20)   | 0.021     | -0.77 (-1.15, -0.39)  | <0.001 | -0.83 (-1.23, -0.42)   | <0.001 | -0.01 (-0.02, -0.00) | 0.032     | -0.00 (-0.01, 0.01)  | 0.688   |
| ΔSpO <sub>2</sub> , %                         | 0.14 (-0.09, 0.35)   | 0.228     | -0.05 (-0.26, 0.16) | 0.626     | 0.35 (-0.55, 1.25)    | 0.446  | -0.22 (-1.17, 0.73)    | 0.651  | 0.01 (-0.02, 0.03)   | 0.676     | -0.02 (-0.04, 0.01)  | 0.222   |
| Event duration, s                             | 0.01 (-0.19, 0.22)   | 0.892     | 0.11 (-0.07, 0.29)  | 0.226     | -0.70 (-1.52, 0.13)   | 0.096  | -0.58 (-1.41, 0.26)    | 0.175  | -0.01 (-0.03, 0.02)  | 0.704     | 0.01 (-0.01, 0.03)   | 0.362   |
| <b>Age ≥ 60 years (n = 76)</b>                |                      |           |                     |           |                       |        |                        |        |                      |           |                      |         |
| ODR, %/s                                      | 3.87 (0.16, 7.59)    | 0.041*    | 1.65 (-2.08, 5.38)  | 0.381     | -2.23 (-26.17, 21.70) | 0.853  | -10.90 (-35.53, 13.72) | 0.379  | 0.21 (-0.30, 0.72)   | 0.408     | -0.07 (-0.66, 0.52)  | 0.806   |
| Δt, s                                         | -0.08 (-0.16, 0.01)  | 0.089     | -0.04 (-0.12, 0.04) | 0.320     | -0.44 (-0.99, 0.11)   | 0.112  | -0.48 (-1.01, 0.06)    | 0.081  | -0.02 (-0.03, -0.01) | 0.002     | -0.02 (-0.03, -0.01) | 0.002   |
| ΔSpO <sub>2</sub> , %                         | 0.05 (-0.11, 0.21)   | 0.526     | 0.06 (-0.08, 0.21)  | 0.374     | -0.07 (-1.08, 0.95)   | 0.899  | 0.21 (-0.74, 1.16)     | 0.664  | -0.00 (-0.02, 0.02)  | 0.998     | 0.00 (-0.02, 0.02)   | 0.967   |
| Event duration, s                             | -0.06 (-0.20, 0.09)  | 0.447     | -0.03 (-0.17, 0.10) | 0.627     | -0.13 (-1.04, 0.79)   | 0.780  | -0.10 (-0.97, 0.78)    | 0.829  | -0.02 (-0.04, 0.00)  | 0.102     | -0.02 (-0.04, 0.00)  | 0.047   |
| <b>AHI &lt; 50 events/h (n = 137)</b>         |                      |           |                     |           |                       |        |                        |        |                      |           |                      |         |
| ODR, %/s                                      | 4.38 (1.79, 6.97)    | 0.001**   | 2.62 (-0.09, 5.34)  | 0.058     | -7.35 (-22.52, 7.81)  | 0.339  | -2.75 (-19.85, 14.34)  | 0.750  | 0.54 (0.18, 0.89)    | 0.003**   | 0.28 (-0.10, 0.66)   | 0.149   |
| Δt, s                                         | 0.06 (-0.01, 0.13)   | 0.110     | 0.07 (0.00, 0.14)   | 0.046     | -0.36 (-0.75, 0.03)   | 0.066  | -0.58 (-0.99, -0.16)   | 0.007  | -0.01 (-0.02, 0.00)  | 0.102     | -0.01 (-0.02, 0.00)  | 0.174   |
| ΔSpO <sub>2</sub> , %                         | 0.05 (-0.19, 0.29)   | 0.672     | 0.03 (-0.20, 0.25)  | 0.814     | 0.39 (-0.97, 1.75)    | 0.575  | 0.42 (-0.97, 1.80)     | 0.555  | 0.02 (-0.02, 0.05)   | 0.333     | 0.01 (-0.02, 0.04)   | 0.510   |
| Event duration, s                             | 0.06 (-0.10, 0.22)   | 0.440     | 0.09 (-0.05, 0.24)  | 0.208     | -0.57 (-1.46, 0.32)   | 0.208  | -0.88 (-1.78, 0.01)    | 0.053  | -0.00 (-0.03, 0.02)  | 0.689     | -0.00 (-0.02, 0.02)  | 0.929   |
| <b>AHI ≥ 50 events/h (n = 160)</b>            |                      |           |                     |           |                       |        |                        |        |                      |           |                      |         |
| ODR, %/s                                      | 9.71 (6.57, 12.84)   | <0.001*** | 7.16 (3.50, 10.82)  | <0.001*** | 3.08 (-10.88, 17.04)  | 0.663  | -8.48 (-25.31, 8.36)   | 0.321  | 1.13 (0.74, 1.52)    | <0.001*** | 0.67 (0.23, 1.11)    | 0.003** |
| Δt, s                                         | -0.04 (-0.17, 0.08)  | 0.502     | 0.03 (-0.09, 0.14)  | 0.681     | -0.85 (-1.33, -0.38)  | 0.001  | -0.89 (-1.38, -0.39)   | 0.001  | -0.02 (-0.04, -0.01) | 0.009     | -0.01 (-0.02, 0.00)  | 0.143   |
| ΔSpO <sub>2</sub> , %                         | 0.03 (-0.17, 0.22)   | 0.780     | 0.01 (-0.17, 0.18)  | 0.951     | -0.15 (-0.93, 0.63)   | 0.703  | -0.34 (-1.12, 0.44)    | 0.390  | -0.01 (-0.03, 0.02)  | 0.457     | -0.01 (-0.03, 0.01)  | 0.371   |
| Event duration, s                             | -0.09 (-0.29, 0.10)  | 0.349     | 0.05 (-0.14, 0.24)  | 0.588     | -0.29 (-1.08, 0.50)   | 0.472  | -0.05 (-0.87, 0.77)    | 0.906  | -0.02 (-0.04, 0.01)  | 0.148     | 0.00 (-0.02, 0.02)   | 0.879   |
| <b>BMI &lt; 30 kg/m<sup>2</sup> (n = 137)</b> |                      |           |                     |           |                       |        |                        |        |                      |           |                      |         |
| ODR, %/s                                      | 7.33 (4.49, 10.17)   | <0.001*** | 4.70 (1.58, 7.82)   | 0.003**   | 12.04 (-3.85, 27.94)  | 0.136  | 5.37 (-13.53, 24.27)   | 0.575  | 0.81 (0.42, 1.19)    | <0.001*** | 0.55 (0.11, 0.99)    | 0.014*  |
| Δt, s                                         | -0.01 (-0.09, 0.07)  | 0.797     | 0.03 (-0.05, 0.11)  | 0.518     | -0.41 (-0.83, 0.02)   | 0.059  | -0.47 (-0.94, -0.01)   | 0.046  | -0.02 (-0.03, -0.01) | 0.002     | -0.01 (-0.02, 0.00)  | 0.035   |
| ΔSpO <sub>2</sub> , %                         | 0.07 (-0.19, 0.34)   | 0.590     | 0.02 (-0.22, 0.26)  | 0.842     | -0.51 (-1.88, 0.85)   | 0.459  | -0.71 (-2.11, 0.68)    | 0.312  | 0.02 (-0.02, 0.05)   | 0.286     | 0.01 (-0.02, 0.04)   | 0.595   |
| Event duration, s                             | 0.09 (-0.14, 0.31)   | 0.455     | 0.13 (-0.07, 0.32)  | 0.208     | -0.84 (-2.00, 0.32)   | 0.154  | -0.83 (-1.98, 0.32)    | 0.155  | -0.01 (-0.04, 0.02)  | 0.671     | -0.00 (-0.03, 0.03)  | 0.854   |
| <b>BMI ≥ 30 kg/m<sup>2</sup> (n = 160)</b>    |                      |           |                     |           |                       |        |                        |        |                      |           |                      |         |

|                       |                     |                     |                    |                |                      |        |                      |        |                     |                     |                     |               |
|-----------------------|---------------------|---------------------|--------------------|----------------|----------------------|--------|----------------------|--------|---------------------|---------------------|---------------------|---------------|
| ODR, %/s              | 8.79 (5.65, 11.92)  | <b>&lt;0.001***</b> | 5.20 (1.75, 8.65)  | <b>0.003**</b> | -4.80 (-18.57, 8.97) | 0.492  | 14.78 (-30.97, 1.42) | 0.073  | 1.00 (0.62, 1.38)   | <b>&lt;0.001***</b> | 0.49 (0.07, 0.91)   | <b>0.023*</b> |
| Δt, s                 | -0.00 (-0.12, 0.12) | 0.981               | 0.09 (-0.02, 0.20) | 0.094          | -0.89 (-1.35, -0.44) | <0.001 | -1.00 (-1.46, -0.54) | <0.001 | -0.01 (-0.03, 0.00) | 0.076               | -0.00 (-0.02, 0.01) | 0.638         |
| ΔSpO <sub>2</sub> , % | 0.07 (-0.12, 0.26)  | 0.476               | 0.01 (-0.16, 0.18) | 0.909          | 0.29 (-0.49, 1.06)   | 0.467  | -0.04 (-0.82, 0.75)  | 0.925  | -0.01 (-0.03, 0.02) | 0.571               | -0.01 (-0.03, 0.01) | 0.253         |
| Event duration, s     | -0.10 (-0.28, 0.08) | 0.256               | 0.01 (-0.15, 0.18) | 0.870          | -0.31 (-1.02, 0.41)  | 0.403  | -0.43 (-1.19, 0.33)  | 0.264  | -0.02 (-0.04, 0.00) | 0.086               | -0.01 (-0.03, 0.01) | 0.524         |

**Notes:** In multiple regression model, no covariable was adjusted in model 1. Adjusted covariables in model 2 include age, gender, BMI, smoking, alcohol consumption, AHI, T90, TST, history of hypertension, diabetes, CHD and antihypertensive medication. The bold fonts represent statistical significance. \* p < 0.05, \*\* p < 0.01, \*\*\* p < 0.001. **Abbreviations:** AHI, apnea-hypopnea index; BMI, body mass index; BP, blood pressure; CHD, coronary heart disease; CI, confidence interval; ODR, oxygen desaturation rate; SpO<sub>2</sub>, peripheral oxygen saturation; T90, percentage of sleep time with SpO<sub>2</sub> < 90%; TST, total sleep time.

**Table s2** Comparison of BP parameters in patients taking different antihypertensive drugs

| Variables              | CCBs (n = 52)           | ACEIs/ARBs (n = 44)     | CCBs + ACEIs/ARBs (n = 31) | P             |
|------------------------|-------------------------|-------------------------|----------------------------|---------------|
| Age, years             | 54.00 (49.00, 62.75)    | 55.00 (44.00, 62.75)    | 53.00 (45.00, 63.00)       | 0.835         |
| BMI, kg/m <sup>2</sup> | 30.11 (27.56, 33.10)    | 29.19 (26.11, 33.61)    | 30.41 (27.02, 34.93)       | 0.604         |
| CHD, n (%)             | 22 (37.29)              | 15 (28.30)              | 11 (31.43)                 | 0.678         |
| Diabetes, n (%)        | 22 (37.29)              | 20 (37.74)              | 16 (45.71)                 | 0.712         |
| AHI, events/h          | 52.30 (29.80, 62.08)    | 46.00 (31.80, 62.85)    | 60.10 (34.60, 77.20)       | 0.114         |
| T90, %                 | 17.40 (5.33, 36.03)     | 20.00 (5.15, 38.33)     | 22.00 (7.60, 56.90)        | 0.500         |
| ODR, %/s               | 0.37 (0.28, 0.44)       | 0.31 (0.23, 0.40)       | 0.35 (0.19, 0.48)          | 0.177         |
| Awake SBP, mmHg        | 126.41 (121.72, 134.28) | 129.43 (120.69, 134.00) | 131.61 (126.00, 136.87)    | 0.235         |
| Awake DBP, mmHg        | 79.90 (76.73, 82.21)    | 79.70 (78.00, 83.45)    | 80.00 (75.21, 86.25)       | 0.762         |
| Nighttime SBP, mmHg    | 123.18 (114.10, 130.44) | 126.84 (115.44, 134.21) | 129.26 (120.00, 138.91)    | 0.066         |
| Nighttime DBP, mmHg    | 79.00 (76.29, 82.41)    | 79.50 (76.56, 82.54)    | 79.00 (74.93, 88.24)       | 0.996         |
| BP rise time, s        | 12.09 (10.57, 14.01)    | 12.40 (11.09, 13.97)    | 11.90 (10.22, 14.44)       | 0.937         |
| BP surge rate, mmHg    | 1.43 (1.06, 1.72)       | 1.55 (1.35, 1.81)       | 1.60 (1.49, 1.80)          | <b>0.043*</b> |
| BP amplitude, mmHg     | 13.73 (12.17, 15.17)    | 14.82 (13.37, 17.83)    | 14.87 (13.14, 16.43)       | <b>0.019*</b> |
| BP peak, mmHg          | 120.62 (111.13, 128.91) | 122.77 (111.25, 132.69) | 129.73 (119.66, 143.13)    | <b>0.048*</b> |

**Notes:** Continuous variables were expressed median [interquartile range] and statistically analyzed by Kruskal-Wallis. Categorical variables were expressed as number (percentage) and tested by chi-square test. The bold fonts represent statistical significance. \* p < 0.05, \*\* p < 0.01, \*\*\* p < 0.001. **Abbreviations:** ACEI/ARB, angiotensin-converting enzyme inhibitor/angiotensin II receptor blocker; AHI, apnea-hypopnea index; BMI, body mass index; BP, blood pressure; CCB, calcium channel blocker; CHD, coronary heart disease; DBP, diastolic blood pressure; ODR, oxygen desaturation rate; SBP, systolic blood pressure; SpO<sub>2</sub>, peripheral oxygen saturation; T90, percentage of sleep time with SpO<sub>2</sub> < 90%.
